# Supplementary material
Source: PubMed Central journal article supplement (PMC3147608)
Supplement: supp_31_15_3105__1.pdf [file supp_31_15_3105__1.pdf]

SUPPLEMENTAL INFORMATION

Topoisomerase 1 and Single Strand Break Repair Modulate Transcription-  
Induced CAG Repeat Instability in Human Cells

Leroy Hubert, Jr., Yunfu Lin, Vincent Dion\*, and John H. Wilson

Verna and Marrs McLean Department of Biochemistry and Molecular Biology  
Baylor College of Medicine  
One Baylor Plaza,  
Houston, TX 77030

## SUPPLEMENTAL FIGURE LEGENDS

Figure S1. Structures of the chemicals used in this paper.

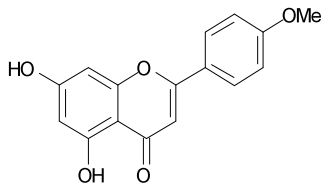

**Acacetin**

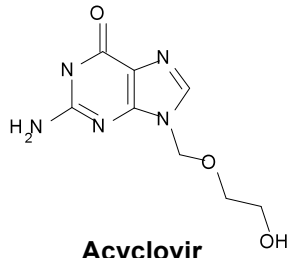

**Acyclovir**

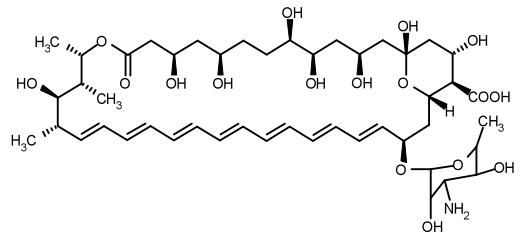

**Amphotericin B**

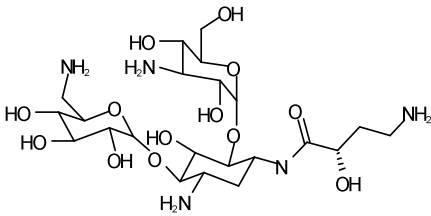

**Amikacin**

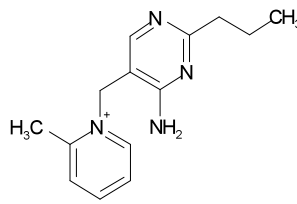

**Ampromium**

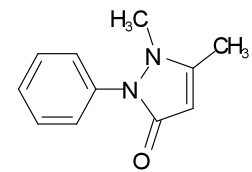

**Antipyrine**

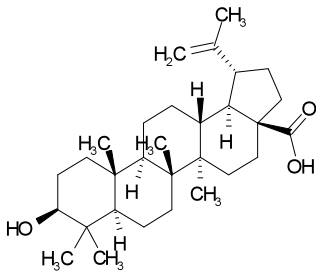

**Betulinic Acid**

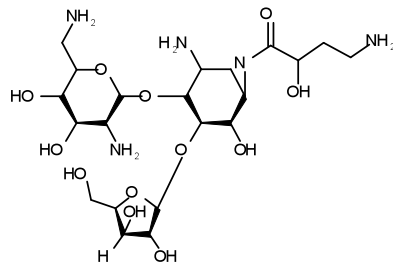

**Butirosin**

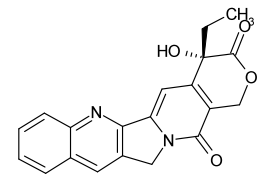

**Camptothecin**

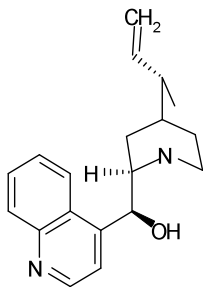

**Cinchonine**

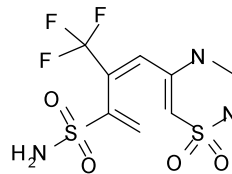

**Hydroflumethiazide**

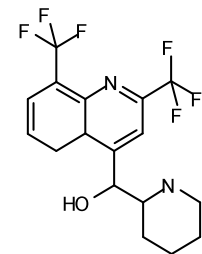

**Mefloquine**

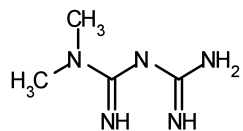

**Metformin**

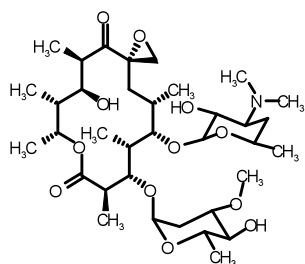

**Oleandomycin**

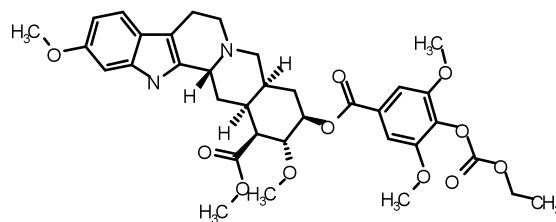

**Syrosingopine**

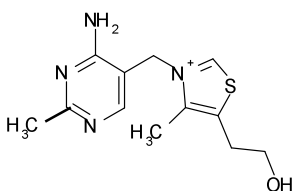

**Thiamine**

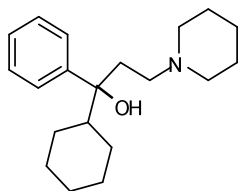

**Trihexyphenidyl**

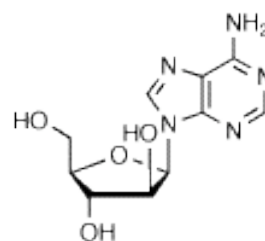

**Vidarabine**

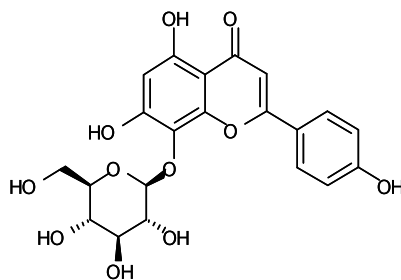

**Vitexin**

FIGURE S1
